# Supplementary material
Source: Research Square preprint supplement (doi:10.21203/rs.3.rs-9454619/v1)
Supplement: Supplementary file 2 [file 3d69a65f3521ec85ebab9cb5.docx]

STROBE Checklist

Strengthening the Reporting of Observational Studies in Epidemiology (von Elm et al., J Clin Epidemiol 2008;61:344–349).

| Item | Topic | STROBE recommendation | Reported location |
| --- | --- | --- | --- |
|  | Title and abstract |  |  |
| 1a | Title/abstract | Indicate the study design with a commonly used term in the title or abstract. | Title: "target trial emulation"; Abstract: "target trial emulation" |
| 1b |  | Provide an informative and balanced summary of what was done and what was found. | Abstract: Purpose, Methods, Results, Conclusions |
|  | Introduction |  |  |
| 2 | Background | Explain the scientific background and rationale for the investigation. | Introduction, paragraphs 1–3 |
| 3 | Objectives | State specific objectives, including any prespecified hypotheses. | Introduction, paragraph 3: comparing ultra-early vs early VP initiation timing |
|  | Methods |  |  |
| 4 | Study design | Present key elements of study design early in the paper. | Methods, Study design: target trial emulation with clone-censor-weight approach |
| 5 | Setting | Describe the setting, locations, and relevant dates. | Methods, Data sources: MIMIC-IV (2008–2022, Boston, US); eICU-CRD (2014–2015, multi-center US) |
| 6a | Participants | Give the eligibility criteria, and the sources and methods of selection of participants. | Methods, Eligibility criteria: adults with septic shock, NE-equivalent ≥0.25 µg/kg/min, no prior VP; follow-up to day 28 |
| 6b |  | For matched studies, give matching criteria and number of exposed and unexposed. | N/A (clone-censor-weight design; cloning described in Statistical analysis) |
| 7 | Variables | Define all outcomes, exposures, predictors, potential confounders, and effect modifiers. | Methods, Outcomes (primary: 28-day mortality; 6 secondary); Covariates (full list); Online Resource 3 |
| 8 | Data sources | For each variable, give sources of data and details of methods of assessment. | Methods, Data sources (ricu package); Online Resource 3 (operational definitions); Online Resource 4 (missing data) |
| 9 | Bias | Describe any efforts to address potential sources of bias. | Methods, Statistical analysis: CCW to address immortal time bias; IPCW for confounding by indication |
| 10 | Study size | Explain how the study size was arrived at. | Results, Cohort characteristics: 5,157 patients from two databases (no a priori sample size calculation; all eligible patients included) |
| 11 | Quantitative variables | Explain how quantitative variables were handled in the analyses. | Methods, Covariates: continuous variables in weight models; subgroup cut points in Online Resource 9 |
| 12a | Statistical methods | Describe all statistical methods, including those used to control for confounding. | Methods, Statistical analysis: CCW with IPCW, weighted KM, risk difference, RMST difference, weighted Cox (supplementary); stratified by database, robust SE clustered by patient |
| 12b |  | Describe any methods used to examine subgroups and interactions. | Methods, Secondary outcomes and subgroup analyses: exploratory stratification by lactate, NE dose, ventilation, SOFA |
| 12c |  | Explain how missing data were addressed. | Methods, Missing data; Online Resource 4: LOCF with variable-specific caps |
| 12d |  | If applicable, explain how loss to follow-up was addressed. | Methods, Statistical analysis: artificial censoring at strategy deviation handled by IPCW |
| 12e |  | Describe any sensitivity analyses. | Methods, Sensitivity analyses: 95th-percentile truncation, weighted Cox with covariate adjustment, separate database analyses, 56 alternative time-zero definitions |
|  | Results |  |  |
| 13a | Participants | Report numbers of individuals at each stage of study. | Results, Cohort characteristics (N = 5,157; 10,314 clones); Figure 1 (flow diagram) |
| 13b |  | Give reasons for non-participation at each stage. | Figure 1: eligibility criteria not met (NE threshold, prior VP, no follow-up) |
| 13c |  | Consider use of a flow diagram. | Figure 1 |
| 14a | Descriptive data | Give characteristics of study participants and information on exposures and potential confounders. | Table 1: baseline characteristics (overall, N = 5,157) |
| 14b |  | Indicate number of participants with missing data for each variable of interest. | Online Resource 5 |
| 14c |  | Summarize follow-up time. | Results, Cohort characteristics |
| 15 | Outcome data | Report numbers of outcome events or summary measures over time. | Table 1 (crude events); Results, Primary and Secondary outcomes; Figure 2 (cumulative incidence curves) |
| 16a | Main results | Give unadjusted estimates and confounder-adjusted estimates and their precision. | Table 1 (crude: 41.3%); Results: RD −5.5 pp (−8.1 to −5.7); RMST +1.49 days (1.51–2.10); HR 0.81 (0.78–0.85) |
| 16b |  | Report category boundaries when continuous variables were categorized. | Results, Subgroup analyses: lactate <2 / 2–<4 / ≥4; NE <0.30 / ≥0.30; SOFA <10 / 10–<14 / ≥14 |
| 16c |  | If relevant, consider translating relative risk into absolute risk. | Results, Primary outcome: absolute RD and RMST difference reported alongside HR |
| 17 | Other analyses | Report other analyses done—subgroups, interactions, sensitivity analyses. | Results, Subgroup analyses (Online Resource 9); Sensitivity analyses (Online Resource 10,11) |
|  | Discussion |  |  |
| 18 | Key results | Summarize key results with reference to study objectives. | Discussion, paragraph 1 |
| 19 | Limitations | Discuss limitations, considering sources of potential bias or imprecision. | Discussion, Limitations paragraph (residual confounding with specific examples, generalizability, proxy definitions, ischemia, misclassification) |
| 20 | Interpretation | Give a cautious overall interpretation. | Discussion, paragraphs 1–8; Conclusions |
| 21 | Generalizability | Discuss the generalizability of the study results. | Discussion, Limitations: results address timing among users; not generalizable to nonusers or later initiators |
|  | Other information |  |  |
| 22 | Funding | Give the source of funding and the role of the funders. | Declarations, Funding: no specific grant received |

CCW, clone-censor-weight; CI, confidence interval; HR, hazard ratio; IPCW, inverse probability of censoring weighting; LOCF, last observation carried forward; NE, norepinephrine; RD, risk difference; RMST, restricted mean survival time; VP, vasopressin.

TARGET Checklist

Transparent Reporting of Observational Studies Emulating a Target Trial (Cashin et al., JAMA 2025;334:1084–1093).

| Item | Checklist item | Reported location |
| --- | --- | --- |
|  | Abstract |  |
| 1a | Identify that the study attempts to emulate a target trial. State objectives and summarize the target trial. | Abstract, Purpose and Methods |
| 1b | Report the data sources used for emulation. | Abstract, Methods: "using MIMIC-IV and eICU-CRD" |
| 1c | Summarize key assumptions, statistical methods, findings and conclusions. | Abstract, Methods, Results and Conclusions |
|  | Introduction |  |
| 2 | Describe the scientific background and gap in knowledge. | Introduction, paragraphs 1–3 |
| 3 | Summarize the causal question. | Introduction, paragraph 3 |
| 4 | Describe the rationale for emulating a target trial. Cite informing randomized trials. | Introduction, paragraphs 1–3; VASST and VANISH cited |
|  | Methods |  |
| 5 | Cite data sources: purpose, type, geography, setting, period, linkage. | Methods, Data sources (MIMIC-IV 2008–2022; eICU-CRD 2014–2015; ricu harmonization) |
| 6a/7a | Eligibility criteria: specify and describe operationalization. | Methods, Eligibility criteria; Online Resource 2 |
| 6b/7b | Treatment strategies: specify and describe operationalization. | Methods, Treatment strategies; Online Resource 2 |
| 6c/7c | Assignment procedures: state random assignment in target trial; describe operationalization. | Methods, Treatment strategies (random assignment stated); Statistical analysis (cloning procedure) |
| 6d/7d | Follow-up: confirm start at assignment; specify end; describe operationalization. | Methods, Statistical analysis (time zero to day 28, death, or end of observation; censoring rules; assignment window event handling) |
| 6e/7e | Outcomes: describe and operationalize. | Methods, Outcomes; Online Resource 3 |
| 6f/7f | Causal contrasts: describe and operationalize, including effect measures. | Methods, Statistical analysis (risk difference, RMST difference as primary; HR as supplementary); Online Resource 2 |
| 6g/7g | Identifying assumptions: describe assumptions for each estimand. | Methods, Covariates: conditional exchangeability assumed; full variable list; Supplementary Methods |
| 6h/7h | Data analysis plan: describe procedures, modelling assumptions, missing data, sensitivity analyses. | Methods, Statistical analysis, Missing data, Sensitivity analyses; Online Resource 4 |
|  | Results |  |
| 8 | Report numbers assessed, eligible, and assigned. Flow diagram strongly recommended. | Results, Cohort characteristics (N = 5,157; 10,314 clones; 943 ultra-early adherent, 323 early adherent); Figure 1 |
| 9 | Describe baseline characteristics by treatment strategy. | Table 1 (overall) |
| 10 | Summarize follow-up length and reasons for end of follow-up. | Results, Cohort characteristics |
| 11 | Describe frequency of missing data. | Online Resource 4 |
| 12 | Describe frequency or distribution of each outcome by strategy. | Table 1 (crude events); Results, Primary and Secondary outcomes |
| 13 | Report effect estimates with precision, including absolute and relative measures. | Results: RD −5.5 pp (−8.1 to −5.7); RMST +1.49 days (1.51–2.10); HR 0.81 (0.78–0.85); Figures 2–3 |
| 14 | Report results of all sensitivity analyses. | Results, Sensitivity analyses; Online Resource 10-11 |
|  | Discussion |  |
| 15 | Provide interpretation of key findings. | Discussion, paragraphs 1–4 |
| 16 | Discuss limitations considering target trial–emulation differences and plausibility of assumptions. | Discussion, Confounding and Limitations paragraphs |
|  | Other information |  |
| 17 | Ethics approval and approval numbers. | Declarations (MIT IRB No. 0403000206; BIDMC 2001-P-001699/14) |
| 18 | State whether the study protocol was registered. | Declarations: not prospectively registered; protocol specified before data extraction |
| 19 | Data, code and materials accessibility. | Declarations, Data availability; Methods, Software and code availability |
| 20 | Funding sources and role of funders. | Declarations, Funding |
| 21 | Conflicts of interest. | Declarations, Competing interests |

HR, hazard ratio; IPCW, inverse probability of censoring weighting; RD, risk difference; RMST, restricted mean survival time.
